# Supplementary material for: Salmonella pathogenicity island 1 knockdown confers protection against myocardial fibrosis and inflammation in uremic cardiomyopathy via down-regulation of S100 Calcium Binding Protein A8/A9 transcription
Source: PubMed Central journal article supplement — Ren Fail. 2022 Oct 26;44(1):1819–32. doi: 10.1080/0886022X.2022.2137421 (PMC9621201; doi:10.1080/0886022x.2022.2137421), 2022-10-26
Supplement: IRNF_A_2137421_SM4739.pdf [file IRNF_A_2137421_SM4739.pdf]

### Supplementary table 1 The binding site of SPI1 and S100A8/A9

| Matrix ID       | TF   | Score     | Relative score | Sequence ID | Start | End | Strand | Predicted sequence |
|-----------------|------|-----------|----------------|-------------|-------|-----|--------|--------------------|
| <u>MA0080.2</u> | SPI1 | 11.542796 | 1.00000001     | S100A8      | 663   | 669 | +      | aggaagt            |
| <u>MA0080.1</u> | SPI1 | 8.578765  | 0.9944638      | S100A8      | 411   | 416 | +      | gggaag             |
| MA0080.1        | SPI1 | 8.578765  | 0.994463805    | S100A9      | 769   | 774 | +      | gggaag             |

Notes: SPI, salmonella pathogenicity island; TF, transfer factor.
